# Supplementary material for: Achieving ZT=2.2 with Bi-doped n-type SnSe single crystals
Source: PubMed Central journal article supplement (PMC5160008; doi:10.1038/ncomms13713), 2016-12-12
Supplement: ncomms13713-s1.pdf [file ncomms13713-s1.pdf]

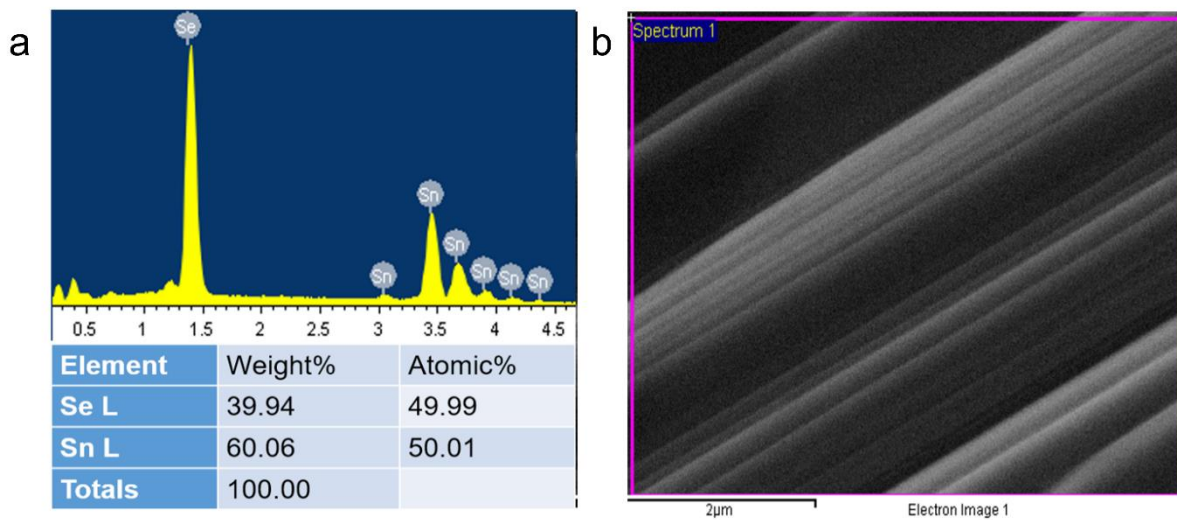

**Supplementary Figure 1. Energy dispersive spectrometer (EDS) measurement**

(a) (EDS) measurement data indicates the stoichiometry of Sn and Se to be 1:1. (b) FE-SEM image, indicating the layered structure of SnSe.

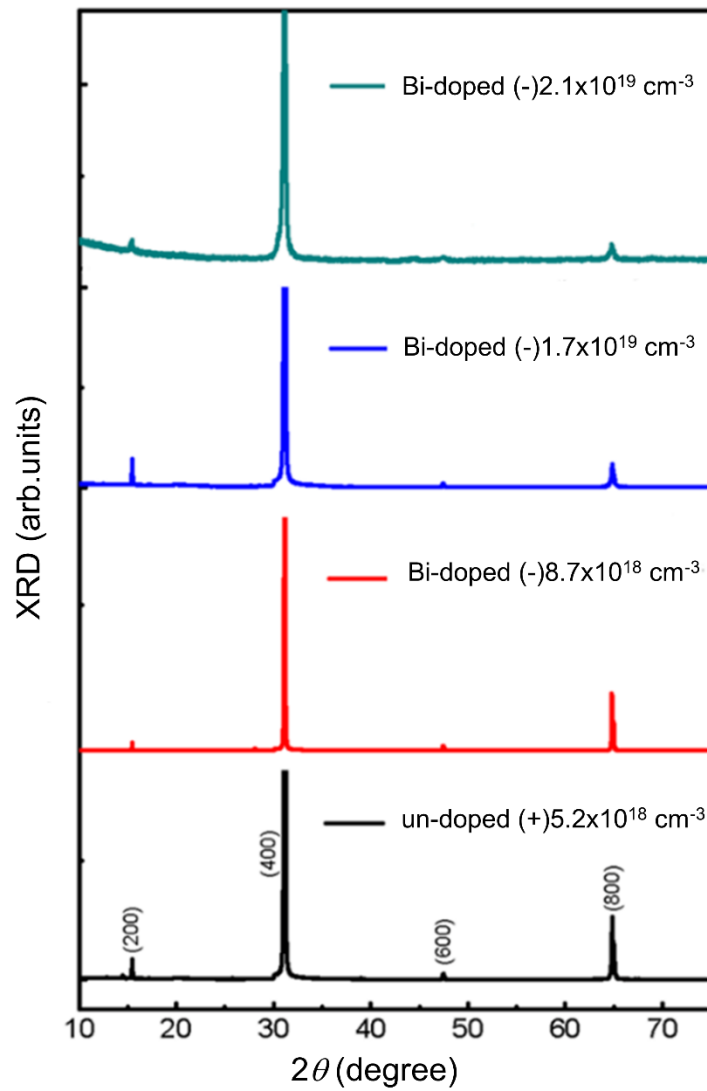

### Supplementary Figure 2. X-Ray diffraction patterns

XRD patterns of un-doped and Bi-doped SnSe single crystals, which were cleaved along **a**-axis.

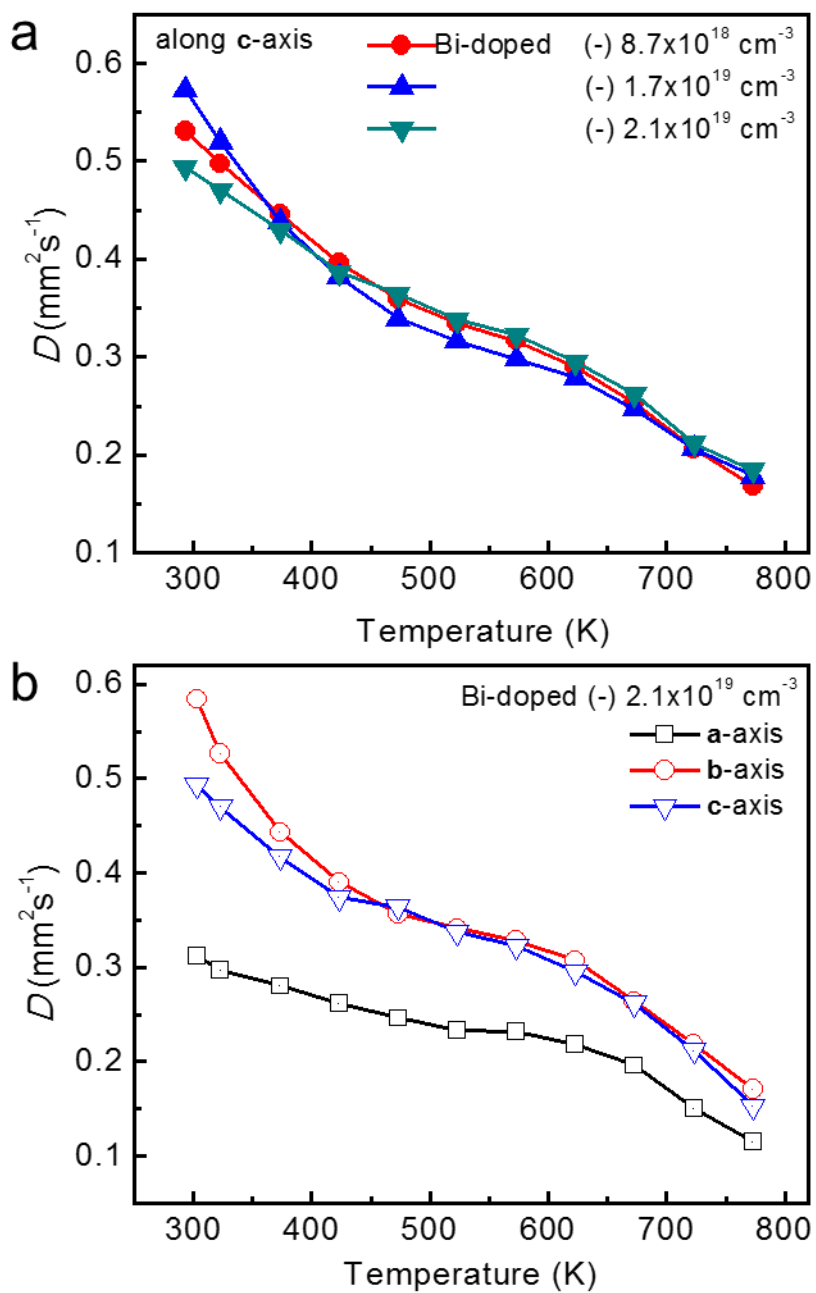

**Supplementary Figure 3. Thermal diffusivity**

(a) Bi-doped SnSe single crystals. (b) along **a**, **b**, and **c** axes of the sample with a carrier concentration of  $2.1 \times 10^{19} \text{ cm}^{-3}$  at 773 K.

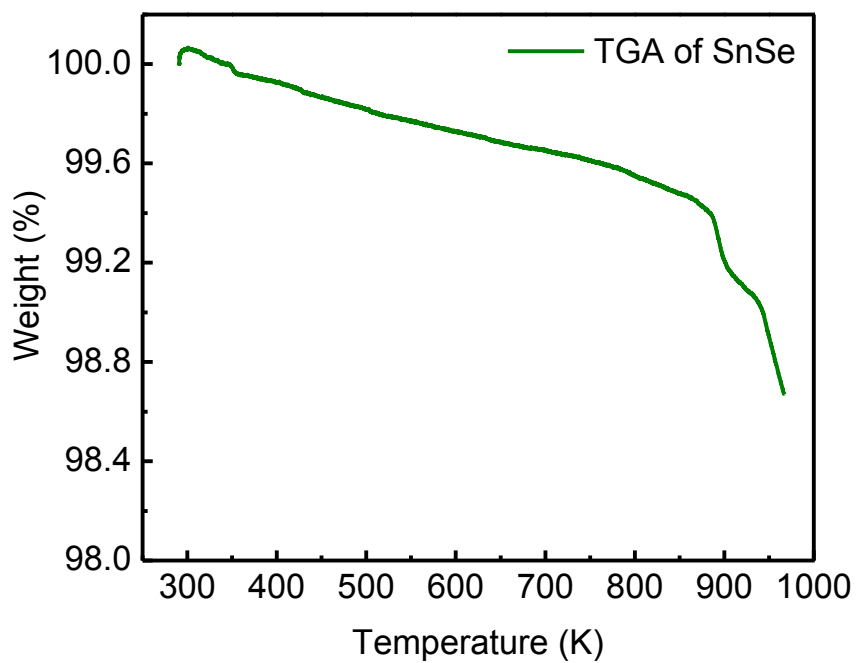

**Supplementary Figure 4. Thermogravimetric analysis (TGA) of SnSe single crystal**

TGA measurement result shows a drop in weight percent of SnSe at around 873 K.

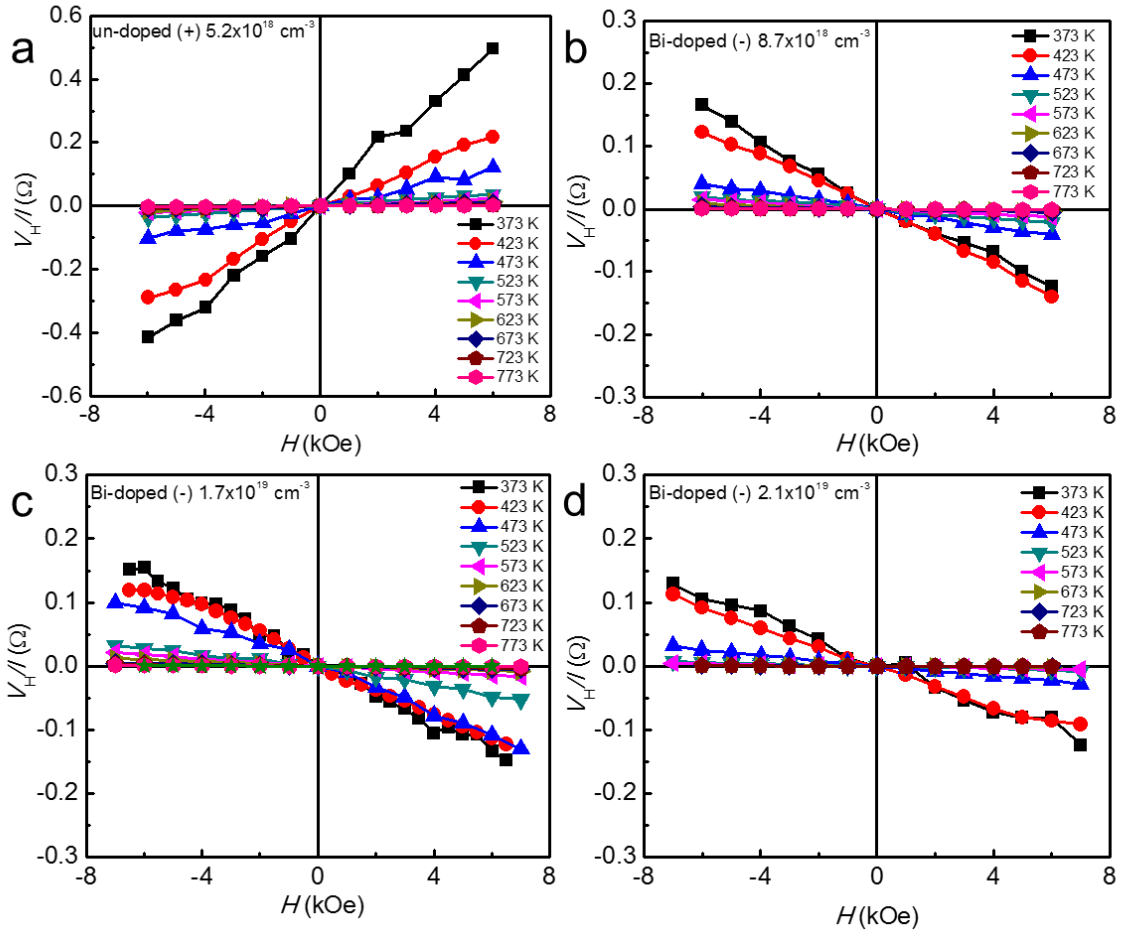

### Supplementary Figure 5. Hall resistance vs. magnetic field

(a) un-doped and (b-d) Bi-doped SnSe single crystals with carrier concentration of  $8.7 \times 10^{18} \text{ cm}^{-3}$ ,  $1.7 \times 10^{19} \text{ cm}^{-3}$ ,  $2.1 \times 10^{19} \text{ cm}^{-3}$ , respectively. We determined the carrier concentrations from the linear fitting of slope. Un-doped sample shows positive slope, indicating dominant hole conduction with the carrier density  $+5.2 \times 10^{18} \text{ cm}^{-3}$  at 773 K.

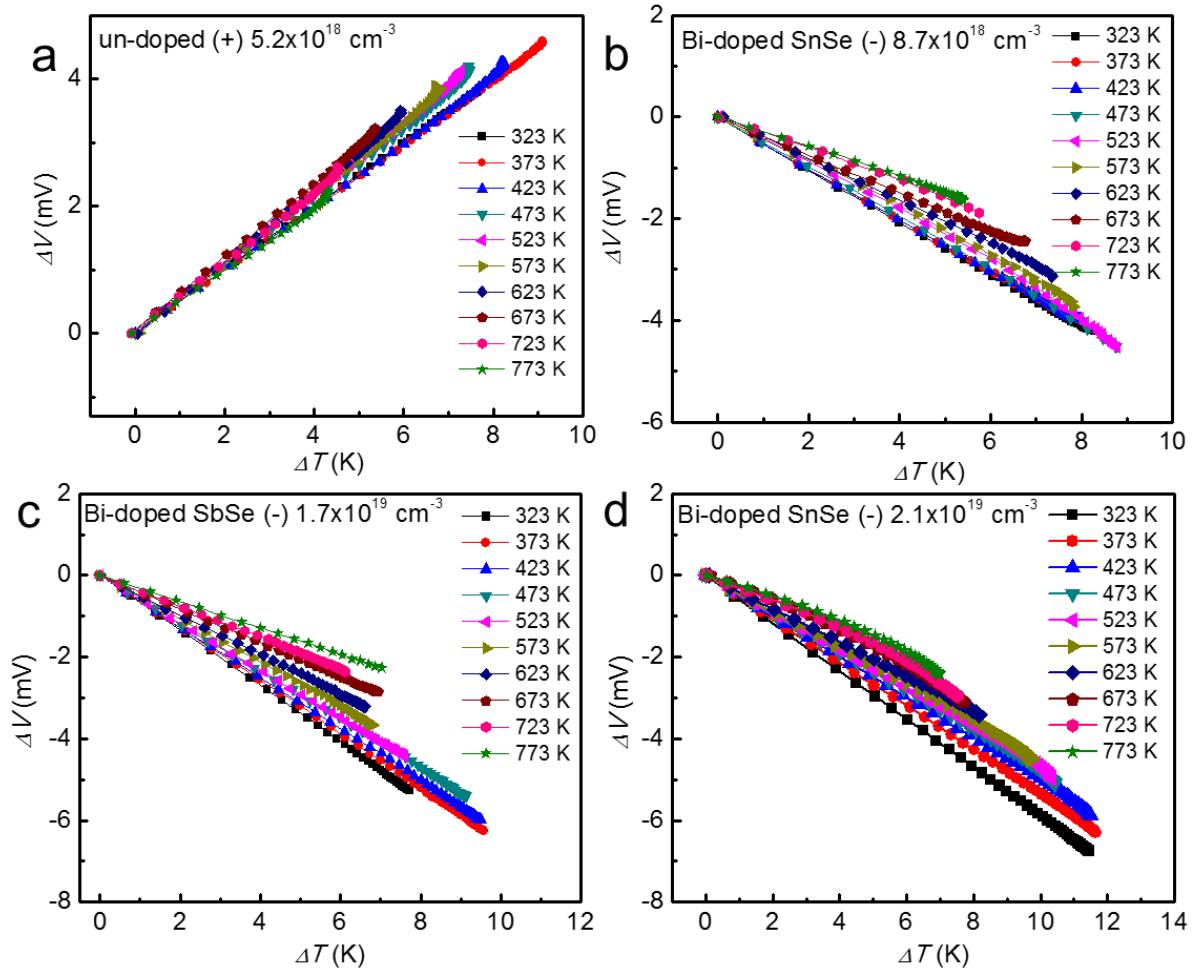

### Supplementary Figure 6. Seebeck coefficient determination

Thermoelectric voltage  $\Delta V$  as a function of temperature gradient  $\Delta T$  of un-doped and Bi doped SnSe single crystal.

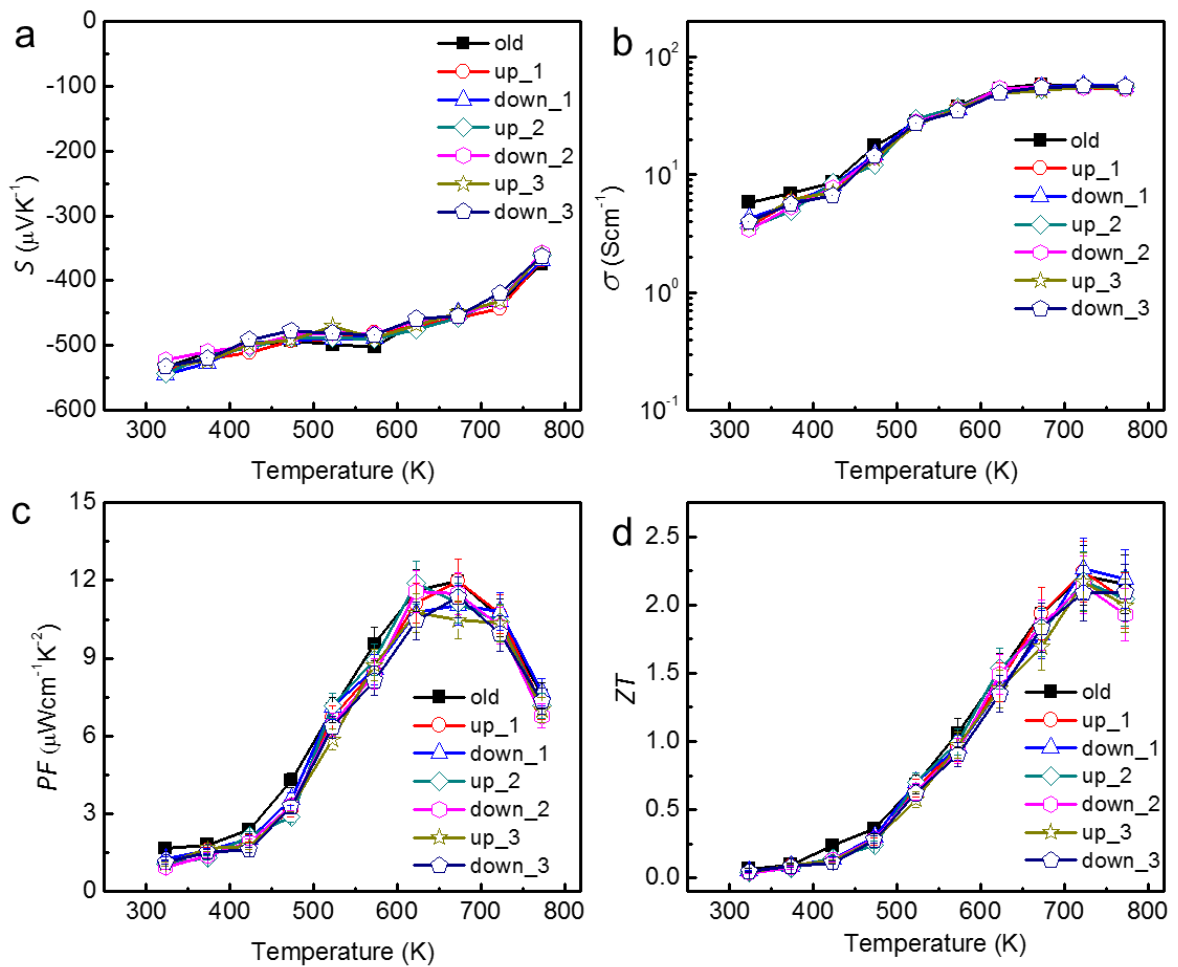

### Supplementary Figure 7. Three continuous thermal cycles measurements

Temperature dependent (a) Seebeck coefficients, (b) electrical conductivities, (c) thermoelectric power factors, and (d)  $ZT$  of Bi-doped SnSe sample with carrier concentration of  $2.1 \times 10^{19} \text{ cm}^{-3}$  at 773 K along b crystal axis. We performed the transport measurements with three continuous thermal cycles in the temperature range of 323 - 773 K. Old indicates the data in the manuscript for comparison.

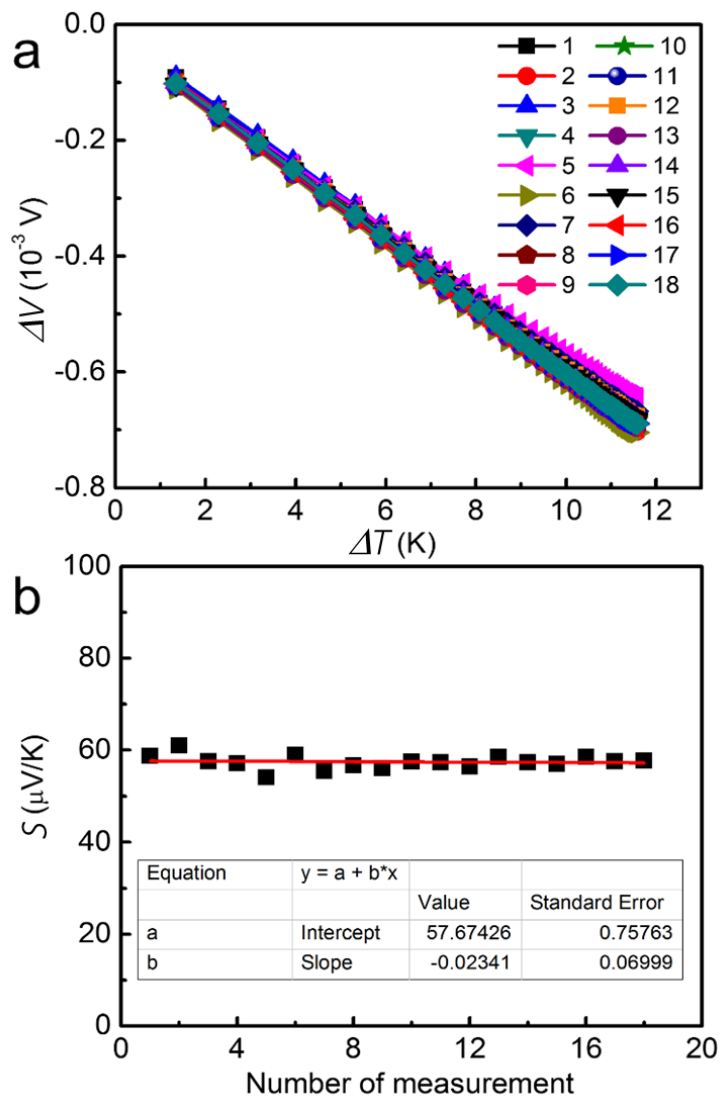

**Supplementary Figure 8. Confirm the accuracy of Seebeck measurement system**

(a) Thermoelectric voltage  $\Delta V$  as a function of temperature gradient  $\Delta T$ ; the linear slopes indicate the Seebeck coefficients of polycrystalline Bi. (b) Seebeck coefficient as a function of number of measurement; red line is linearly fitted line using Origin program. Fitting parameters in inset box indicate the average of Seebeck coefficients for 18 times measurements and standard error, 1.3%.



### Supplementary Note 1. How to determine measurements error levels.

We determined the error levels of three transport properties (electrical conductivity, Seebeck coefficient, and thermal conductivity) as below.

- For electrical conductivity,  $\sigma = \frac{1}{\rho} = \frac{l}{Rab}$  where  $\rho$  is resistivity,  $R$  is resistance,  $l$  is length of sample, and  $a$  and  $b$  are width and height of sample.

Average of electrical conductivity

$$\langle \sigma \rangle = \frac{\langle l \rangle}{\langle a \rangle \langle b \rangle \langle R \rangle} \quad (1)$$

$$\text{Error of } \sigma \text{ is } \frac{\Delta \sigma}{\langle \sigma \rangle} = \left\{ \frac{\Delta l}{\langle l \rangle} + \frac{\Delta a}{\langle a \rangle} + \frac{\Delta b}{\langle b \rangle} + \frac{\Delta R}{\langle R \rangle} \right\} \quad (2)$$

Sample sizes;  $l = 2$  mm;  $a = 2$  mm;  $b = 0.3$  mm, and  $R = V/I$  (Keithley model 2400 series with error less than 0.1%);

$$\Delta l = \Delta a = \Delta b = 0.01 \text{ mm then}$$

$$\frac{\Delta \sigma}{\langle \sigma \rangle} = \left\{ \frac{0.01}{2} + \frac{0.01}{2} + \frac{0.01}{0.3} \right\} = 0.043 \quad (3)$$

Error for electrical conductivity measurement is 4.3%.

- For Seebeck coefficient measurements. To determine error for Seebeck coefficient, we used a Bi sample whose Seebeck coefficient is well known; i.e. we measured the Seebeck coefficients of polycrystalline Bi for 18 times as shown in Supplementary Figure 8. We determined Seebeck coefficients from the slope of thermoelectric voltage  $\Delta V$  vs. temperature gradient  $\Delta T$  curve. The measured Seebeck coefficient of polycrystalline Bi is  $-57.7 \pm 0.76$   $\mu\text{V.K}^{-1}$ . Standard error from the linear fitting is 1.3%. Note that the Seebeck coefficient of Bi single crystal is  $-51.4$   $\mu\text{V.K}^{-1}$  along perpendicular to the three fold axis and  $-102.7$   $\mu\text{V.K}^{-1}$  along parallel to the three fold axis.<sup>3</sup> The Seebeck coefficient of the reported polycrystalline Bi is  $-60$   $\mu\text{V.K}^{-1}$  at 300 K (ref. 4). The slight difference between the measured and reported values are sample quality such as grain size, purity, etc.

- For thermal conductivity measurement, we used Laser Flash Apparatus LFA 457 MicroFlash measurement system with the error of  $\pm 3\%$ .
- Power factor ( $PF$ ) is calculated by Seebeck coefficient and electrical conductivity as below:

$$PF = S^2 \sigma \quad (4)$$

So  $PF$  error is estimated:

$$\frac{\Delta PF}{\langle PF \rangle} = \left( \frac{\Delta S}{\langle S \rangle} + \frac{\Delta S}{\langle S \rangle} + \frac{\Delta \sigma}{\langle \sigma \rangle} \right) = (0.013 + 0.013 + 0.043) = 0.069 \quad (5)$$

- $ZT$  error is estimated:

$$\frac{\Delta ZT}{\langle ZT \rangle} = \left( \frac{\Delta S}{\langle S \rangle} + \frac{\Delta S}{\langle S \rangle} + \frac{\Delta \sigma}{\langle \sigma \rangle} + \frac{\Delta \kappa}{\langle \kappa \rangle} \right) \quad (6)$$

$$= (0.013 + 0.013 + 0.043 + 0.03) = 0.099$$

Power factor and  $ZT$  error in our measurements are 6.9% and 9.9%, respectively.

Thus, we added error bars in the figures
